# Supplementary material for: Evaluation of the risk of lymphomagenesis in xenografts by the PCR-based detection of EBV BamHI W region in patient cancer specimens
Source: PubMed Central journal article supplement (PMC5226574; doi:10.18632/oncotarget.10322), 2016-06-29
Supplement: oncotarget-07-50150-s001.pdf [file oncotarget-07-50150-s001.pdf]

## Evaluation of the risk of lymphomagenesis in xenografts by the PCR-based detection of EBV BamHI W region in patient cancer specimens

### SUPPLEMENTARY FIGURES

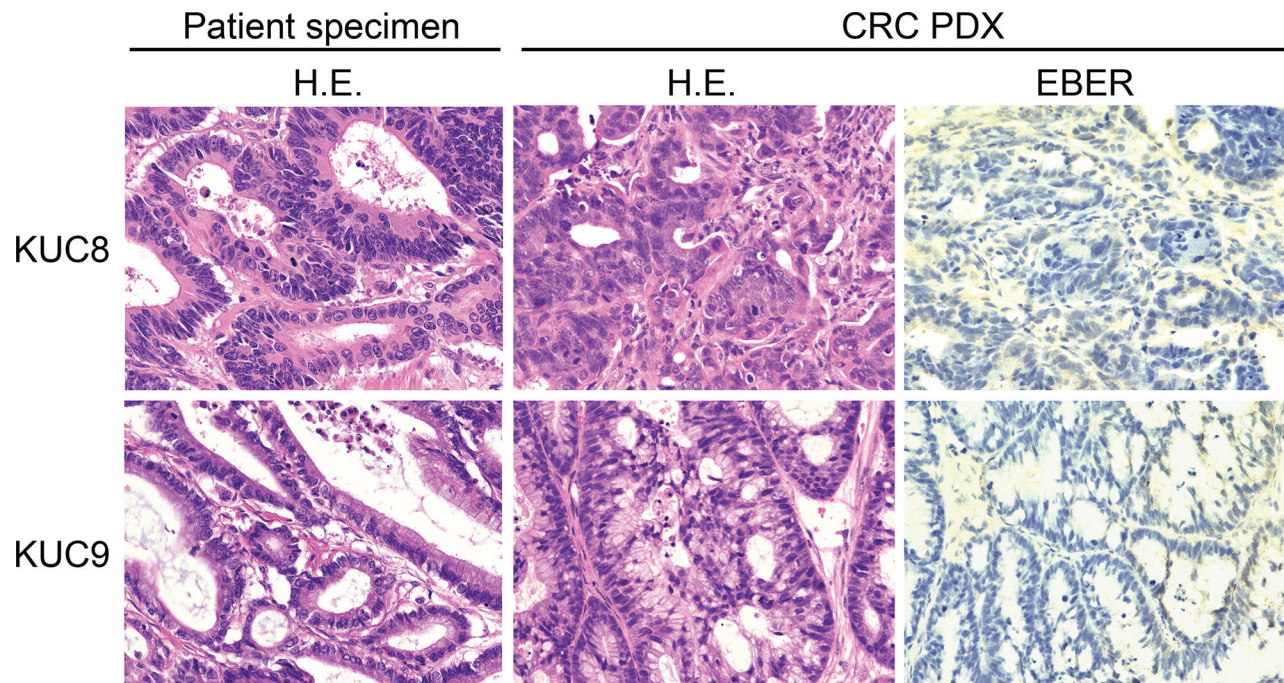

**Supplementary Figure S1: Establishment of the CRC PDXs from human CRC specimens.** Representative sections of the patient specimens and CRC PDXs (H.E., left and middle panels) (original magnification,  $\times 200$ ). EBER was undetectable by EBER-ISH in CRC PDXs (right panels).

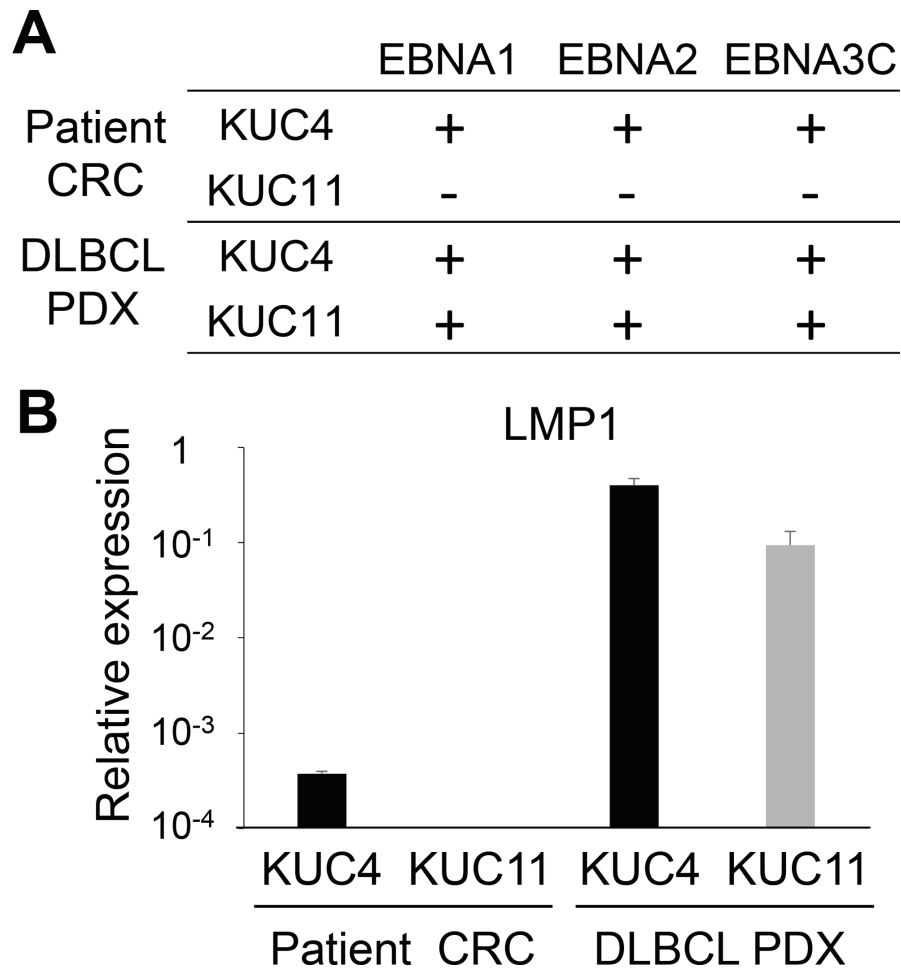

**Supplementary Figure S2: Expression levels of the EBNA1 and LMP1 in the patient CRC specimens and DLBCL PDXs.** **A.** Expression of EBNA mRNA in the DLBCL PDXs and corresponding patient CRC specimens were analyzed by semi-quantitative RT-PCR. GAPDH was amplified as an internal control. Expression of mRNA is presented as undetectable (-) or detectable (+). **B.** Expression levels of LMP1 in the DLBCL PDXs and the corresponding patient CRC specimens were analyzed by semi-quantitative RT-PCR. Amount of the expression level of GAPDH was set as 1. The data are mean + S.D. (n=2).

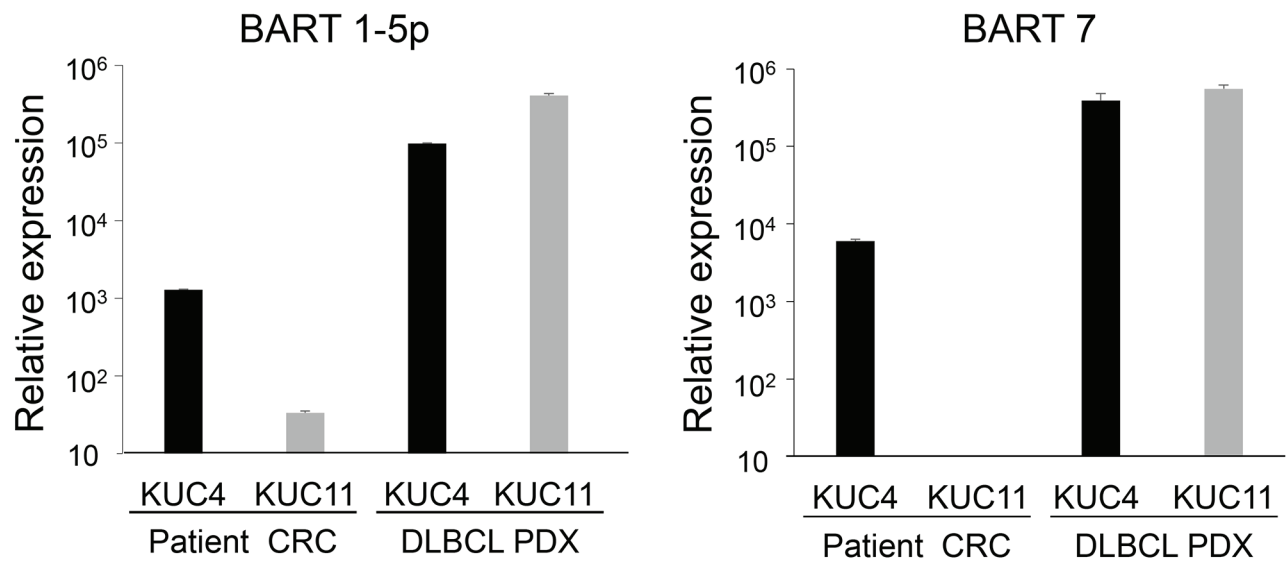

**Supplementary Figure S3: Expression levels of the BART miRNAs in the patient CRC specimens and DLBCL PDXs.** Expression levels of BART 1-5p and BART 7 mRNA in the DLBCL PDXs and the corresponding patient CRC specimens were analyzed by semi-quantitative RT-PCR. Amount of the expression level of an internal control small RNA, SNORD 48, was set as 1. The data are mean + S.D. (n=2).
